# Supplementary material
Source: MDPI journal article supplement (https://www.mdpi.com/2073-4344/12/6/668)
Supplement: s1 [file s1]

Supplementary Material

# Aqueous-phase glycerol conversion over Ni-based catalysts synthesized by nanocasting

Adriana Morales-Marín <sup>1</sup>, Unai Iriarte-Velasco <sup>2</sup>, Miguel Ángel Gutiérrez-Ortiz <sup>1</sup>  
and Jose Luis Ayastuy <sup>1,\*</sup>

<sup>1</sup> Affiliation 1; Department of Chemical Engineering, Faculty of Science and Technology, University of the Basque Country (UPV/EHU).

<sup>2</sup> Affiliation 2; Department of Chemical Engineering, Faculty of Pharmacy, University of the Basque Country (UPV/EHU).

\* Correspondence: joseluis.ayastuy@e-mail.com

## 1. FTIR of SBA-15 calcined at 850 °C.

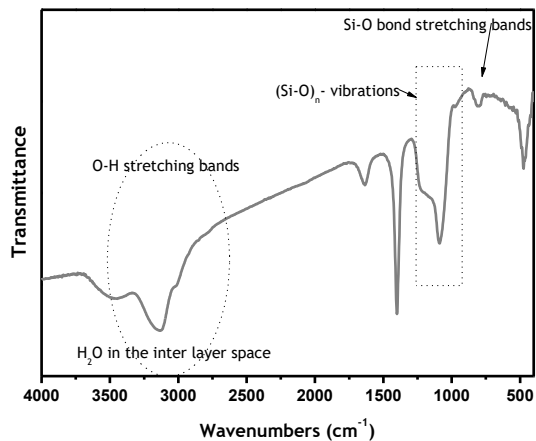

Figure S1. FTIR of SBA-15 calcined at 850 °C

## 2. Reaction indices variation with TOS

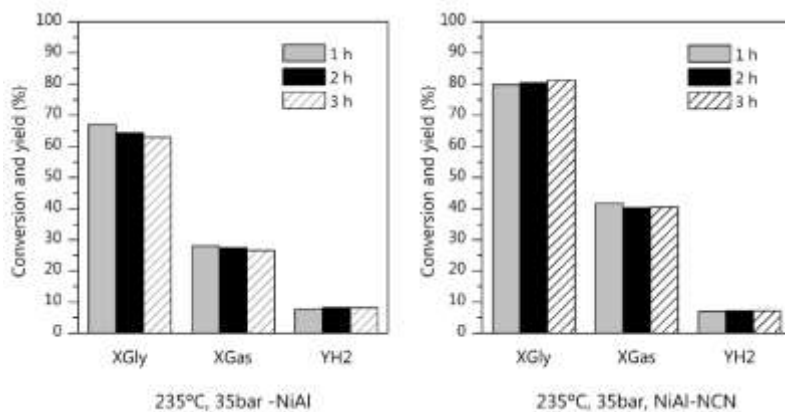

Figure S2. Variation of reaction indices with TOS. (A) NiAl, (B) NiAl-NCN.

### 3. H<sub>2</sub>-TPR of spent catalysts

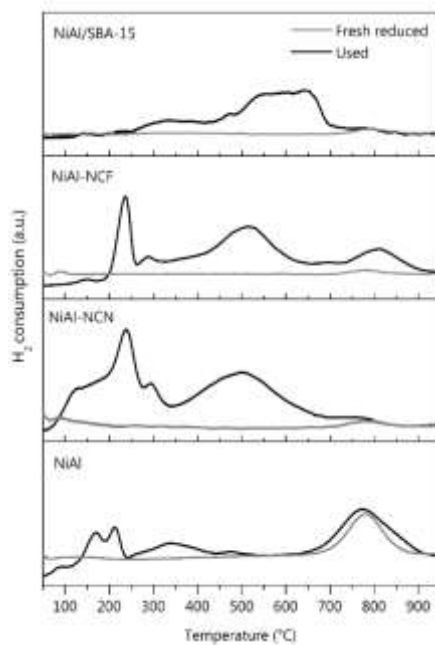

Figure S3. Reduction profiles of used catalysts in aqueous-phase reaction for 3 h.

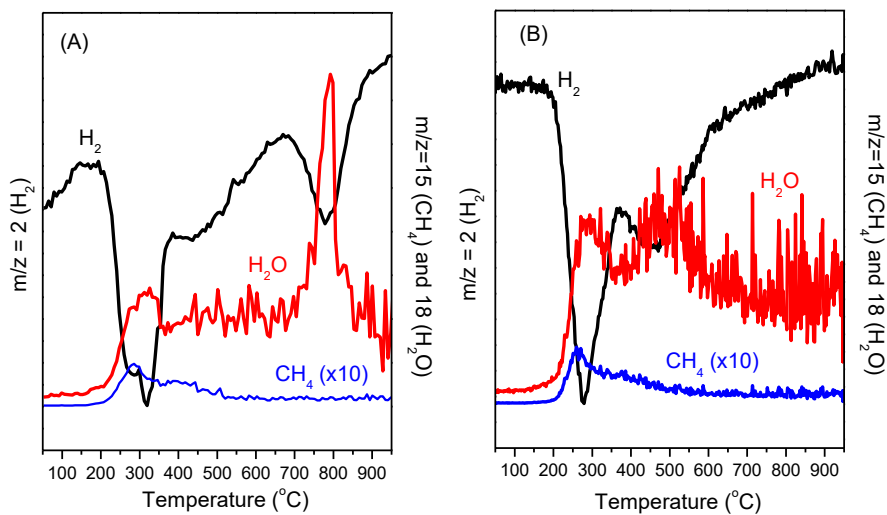

Figure S4. TPR-MS of used catalysts in aqueous-phase reaction for 3 h. (A) NiAl, (B) NiAl-NCN.

#### 4. Diffusion control analysis

**Table S1.** Parameters of mass transfer limitations for supported (NiAl/SBA-15) and nanocasted catalysts.

| Parameter                                                                                        | NiAl                  | NiAl/SBA-15           | NiAl-NCF              | NiAl-NCN              |
|--------------------------------------------------------------------------------------------------|-----------------------|-----------------------|-----------------------|-----------------------|
| $r_{obs}$<br>( $\text{mol}_{\text{Gly}} \cdot \text{s}^{-1} \cdot \text{kg}_{\text{cat}}^{-1}$ ) | $9.74 \times 10^{-4}$ | $4.06 \times 10^{-4}$ | $1.38 \times 10^{-3}$ | $5.73 \times 10^{-3}$ |
| $\rho_{\text{cat}}$ ( $\text{kg} \cdot \text{m}^{-3}$ )                                          | 2283                  | 6490                  | 2797                  | 6490                  |
| $C_{\text{Gly},S}$ ( $\text{mol}_{\text{Gly}} \cdot \text{m}^{-3}$ )                             | 1136                  | 1016                  | 1033                  | 1046                  |
| $\Phi_{\text{WP}} < 0.6$                                                                         | 0.01                  | $1.4 \times 10^{-2}$  | $2.0 \times 10^{-2}$  | $1.9 \times 10^{-1}$  |
| $\rho_{\text{bed}}$ ( $\text{kg} \cdot \text{m}^{-3}$ )                                          | 1212                  | 788                   | 788                   | 788                   |
| $Re$                                                                                             | 0.19                  | 0.19                  | 0.19                  | 0.19                  |
| $Sc$                                                                                             | 11.61                 | 11.13                 | 11.13                 | 11.13                 |
| $Sh$                                                                                             | 4.36                  | 2.20                  | 4.37                  | 2.20                  |
| $K_c$ ( $\text{m} \cdot \text{s}^{-1}$ )                                                         | $3.26 \times 10^{-4}$ | $1.64 \times 10^{-4}$ | $3.26 \times 10^{-4}$ | $1.64 \times 10^{-4}$ |
| $MR < 0.15$                                                                                      | $2.56 \times 10^{-4}$ | $1.5 \times 10^{-4}$  | $2.6 \times 10^{-4}$  | $2.0 \times 10^{-3}$  |

#### 4. Comparison with other works of Ni-based catalysts in literature

**Table S2.** Comparison with other works in the literature.

[illegible]

## REFERENCES

- [1] Bastan, F.; Kazemeini, M.; Larimi, A., Maleki, H. Production of renewable hydrogen through aqueous-phase reforming of glycerol over Ni/Al<sub>2</sub>O<sub>3</sub>-MgO nano-catalyst. *Int J Hydrogen Energy* 2018, 43, 614-621.
- [2] El Doukkali, M.; Iriondo, A.; Arias, P.L.; Requies, J.; Gandarias, I.; Jalowiecki-Duhamel, L., Dumeignil, F. A comparison of sol-gel and impregnated Pt or/and Ni based  $\gamma$ -alumina catalysts for bioglycerol aqueous phase reforming. *Appl.Catal.B Environ.* 2012, 125, 516-529.
- [3] Park, Y.H.; Kim, J.Y.; Moon, D.J.; Park, N.C., Kim, Y.C. Effect of LaAlO<sub>3</sub>-supported modified Ni-based catalysts on aqueous phase reforming of glycerol. *Res Chem Intermed* 2015, 41, 9603-9614.
- [4] Rahman, M.M.; Church, T.L.; Variava, M.F.; Harris, A.T., Minett, A.I. Bimetallic Pt-Ni composites on ceria-doped alumina supports as catalysts in the aqueous-phase reforming of glycerol. *RSC Adv.* 2014, 4, 18951-18960.
- [5] Manfro, R.L.; Pires, T. P. M. D.; Ribeiro, N.F.P., Souza, M. M. V. M. Aqueous-phase reforming of glycerol using Ni-Cu catalysts prepared from hydrotalcite-like precursors. *Catal.Sci.Technolog.* 2013, 3, 1278-1287.
- [6] Rahman, M.M. Aqueous-Phase Reforming of Glycerol over Carbon-Nanotube-Supported Catalysts. *Catal Lett* 2020, 150, 2674-2687.
- [7] Bastan, F.; Kazemeini, M., Larimi, A.S. Aqueous-phase reforming of glycerol for production of alkanes over Ni/Ce<sub>x</sub>Zr<sub>1-x</sub>O<sub>2</sub> nano-catalyst: Effects of the support's composition. *Renew.Energy* 2017, 108, 417-424.
